# Supplementary material for: Amino acid-stabilized luminescent gold clusters for sensing pterin and its analogues
Source: Royal Society of Chemistry journal article supplement (doi:10.1039/d4ay00700j), 2024-01-01
Supplement: d4ay00700j1.pdf [file d4ay00700j1.pdf]

## SUPPLEMENTARY INFORMATION

### Amino Acid-Stabilized Luminescent Gold Clusters for Sensing Pterin and its Analogues

Tomash S. Sych<sup>\*</sup>, Nikolai V. Shekhovtsov, Andrey A. Buglak and Alexei I. Kononov

*St Petersburg University, Saint-Petersburg 199034, Russia*

*<sup>\*</sup>E-mail: [t.sych@spbu.ru](mailto:t.sych@spbu.ru)*

Calculation formula for relative QY:  $\varphi = \varphi_s \frac{FA_S n^2}{F_s A n_s^2}$ , where  $\varphi$  – QY of the sample,  $\varphi_s$  – QY of the reference,  $F$  – integral of the sample emission,  $F_s$  – integral of the reference emission,  $A$  – absorption of the sample,  $A_s$  – absorption of the reference,  $n$  – refractive index of the sample,  $n_s$  – refractive index of the reference.

#### LOD calculation procedure

The values of limit of detection (LOD) can be obtained using the following formula (1):

$$LOD = 3.3\sigma/S \quad (1)$$

, where  $\sigma$  is the residual standard deviation (also known as “root MSE” – root mean square of the error), and  $S$  is the slope of the calibration curve. In our case, we used the slope of the calibration curve in the linear range. We calculated  $\sigma$  as the root-mean-square approximation error obtained using the formula (2):

$$\sigma = \sqrt{\chi_{red.}^2} \quad (2)$$

In the formula (2),  $\chi_{red.}^2$  means the reduced “chi-squared”:

$$\chi_{red.}^2 = \frac{\chi^2}{\nu} = \frac{\chi^2}{N-p} \quad (3)$$

In the formula (3),  $\chi^2$  is the residual sum of squares (RSS),  $\nu$  are degrees of freedom (which is equal to  $N-p$ ),  $N$  is the number of data points,  $p$  is the number of fit function parameters  $\beta$ . The value of RSS used above can be calculated using the formula (4):

$$\chi^2 = \sum_{i=1}^N w_i \left( y_i - f(x_i, \beta_1, \dots, \beta_p) \right)^2 \quad (4)$$

This value is minimized during the fit to find the optimal fit function parameters  $\beta$ .

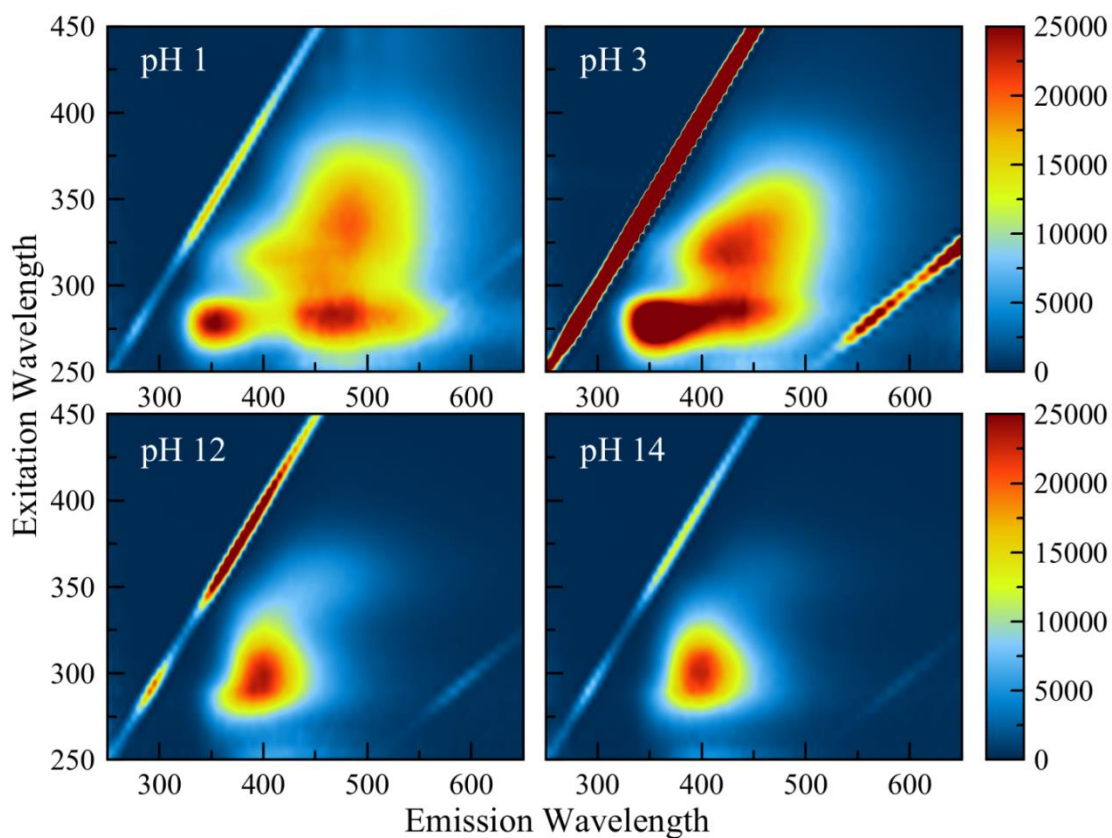

**Figure S1.** 2D contour plots for Trp-Au NCs in acidic (top) and alkali (bottom) conditions. In present work, Trp-Au NCs were used at pH 12 (bottom left).

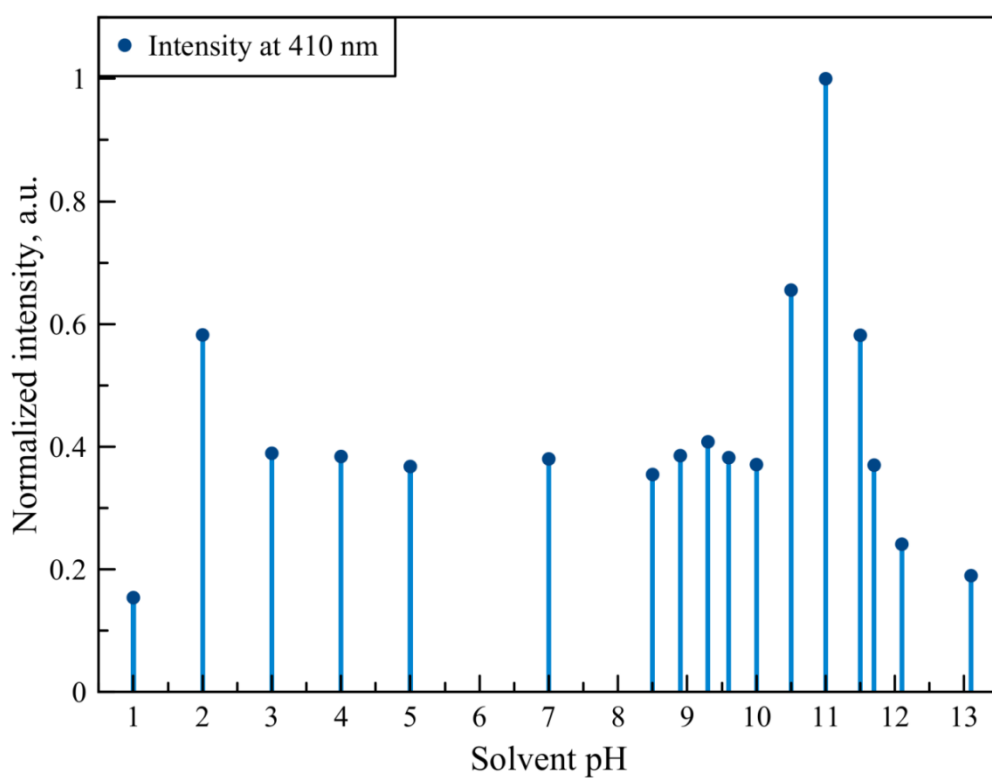

**Figure S2.** Relative emission intensity at 410 nm of DOPA-Au NCs versus solvent pH. The [Au]:[DOPA] ratio is 5.

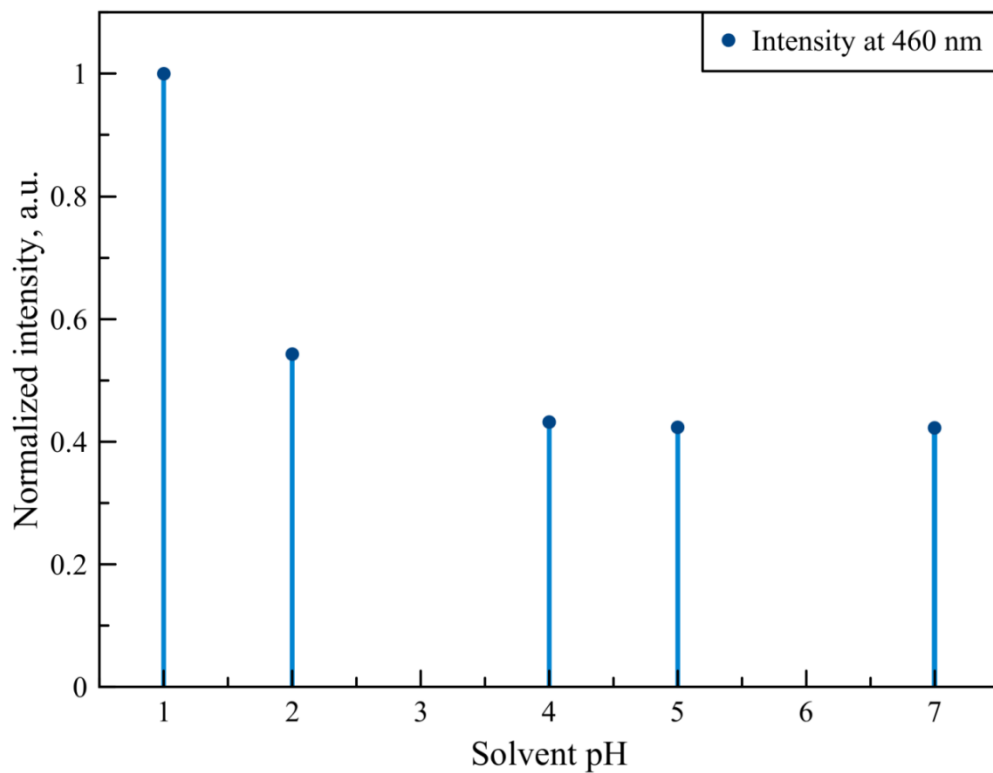

**Figure S3.** Relative emission intensity at 460 nm of Trp-Au NCs versus solvent pH. The [Au]:[DOPA] ratio is 2.

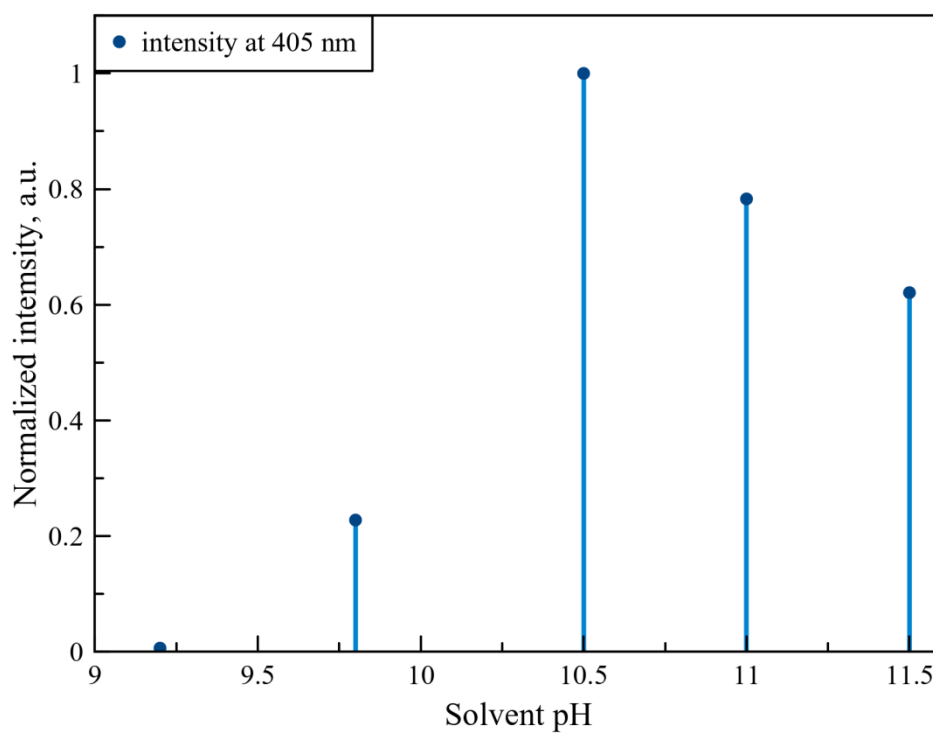

**Figure S4.** Relative emission intensity at 405 nm of Tyr-Au NCs (a) versus solvent pH. The [Au]:[Tyr] ratio is 0.33.

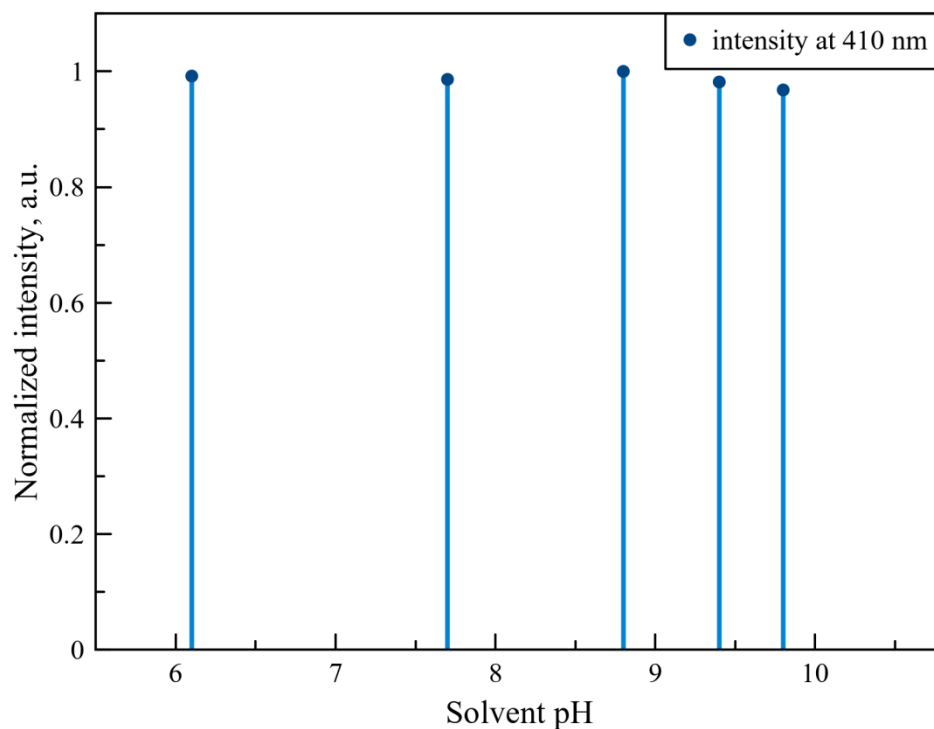

**Figure S5.** Relative emission intensity at 410 nm of Tyr-Au NCs (b) versus solvent pH. The [Au]:[Tyr] ratio is 0.5.

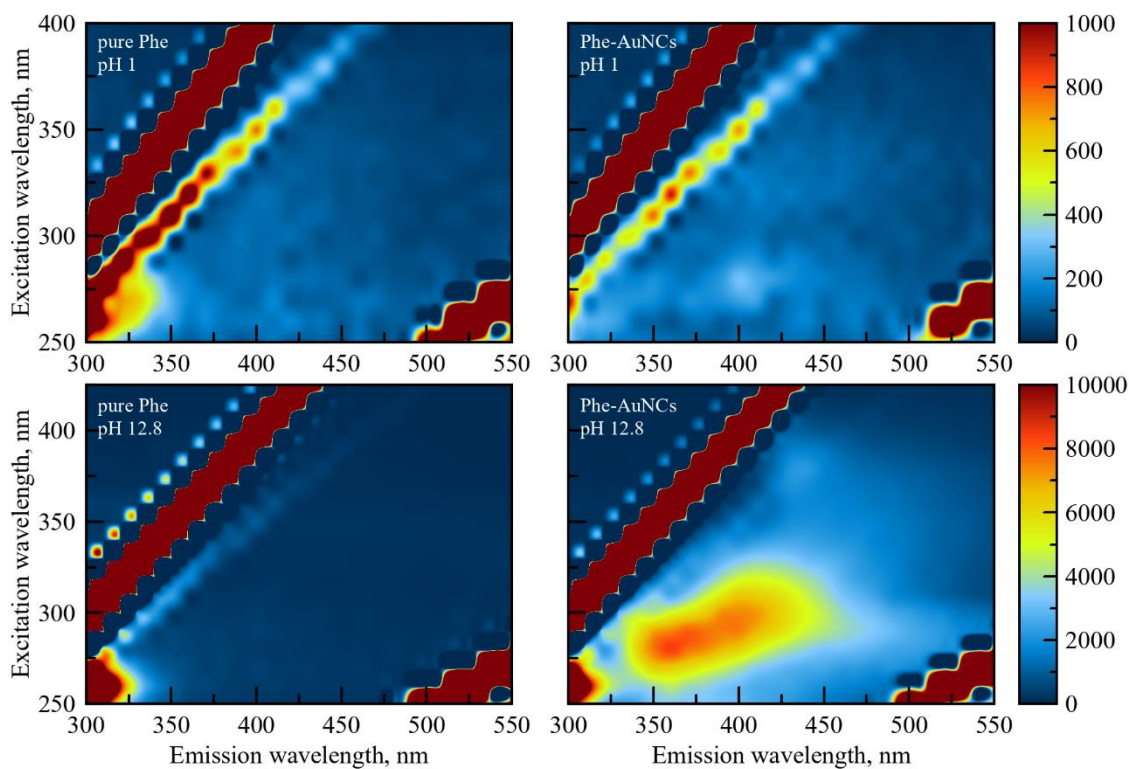

**Figure S6.** 2D contour plots for Phe-Au NCs in acidic (top) and alkali (bottom) conditions

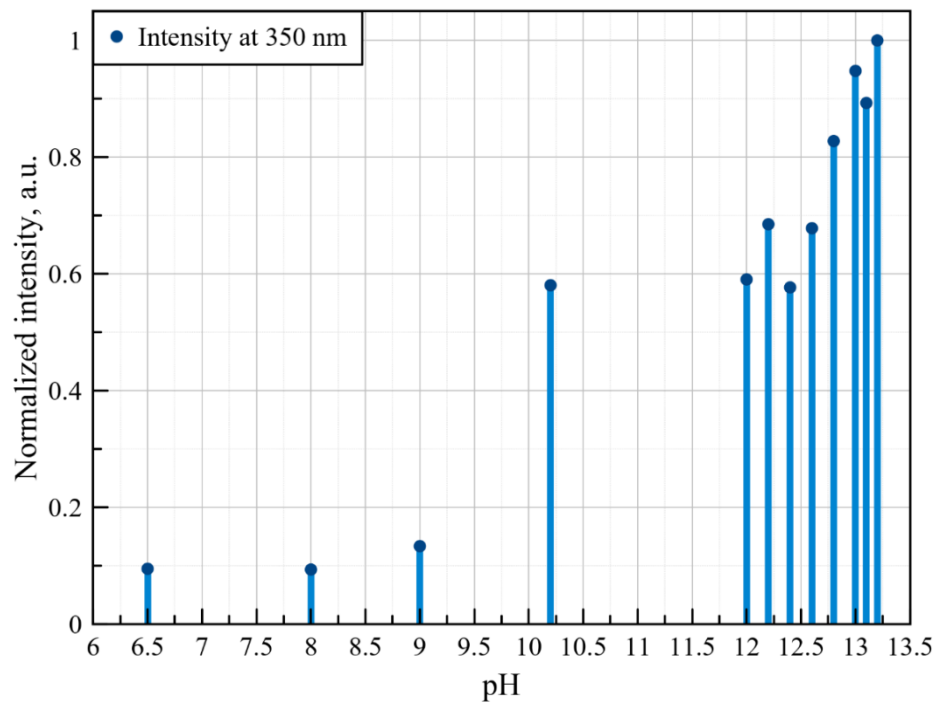

**Figure S7.** Relative emission intensity at 350 nm of Phe-Au NCs under different pH values.

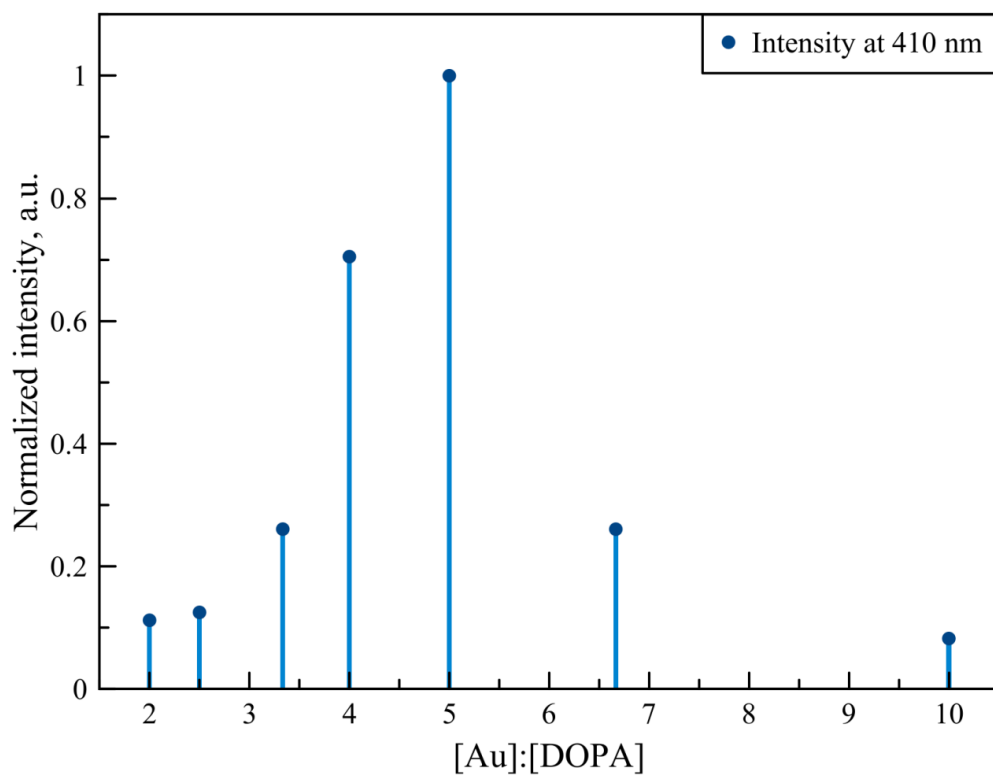

**Figure S8.** Relative emission intensity at 410 nm of DOPA-Au NCs versus [Au]:[DOPA] ratio. The solvent pH is 11.

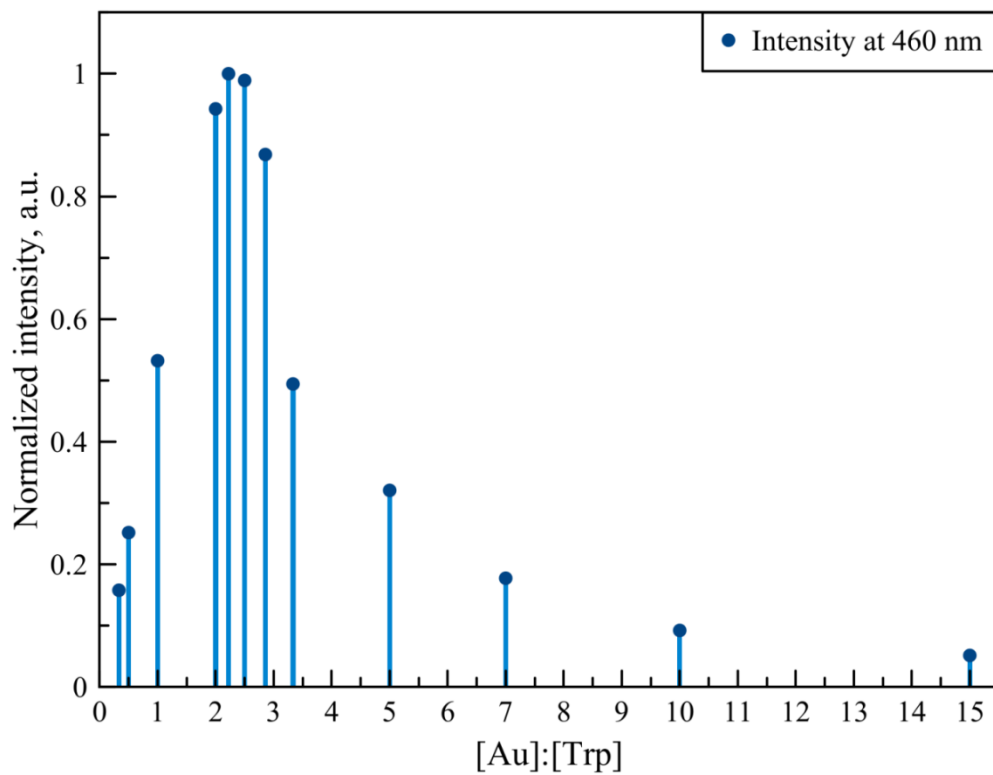

**Figure S9.** Relative emission intensity at 460 nm of Trp-Au NCs versus [Au]:[Trp] ratio. The solvent pH is 1.

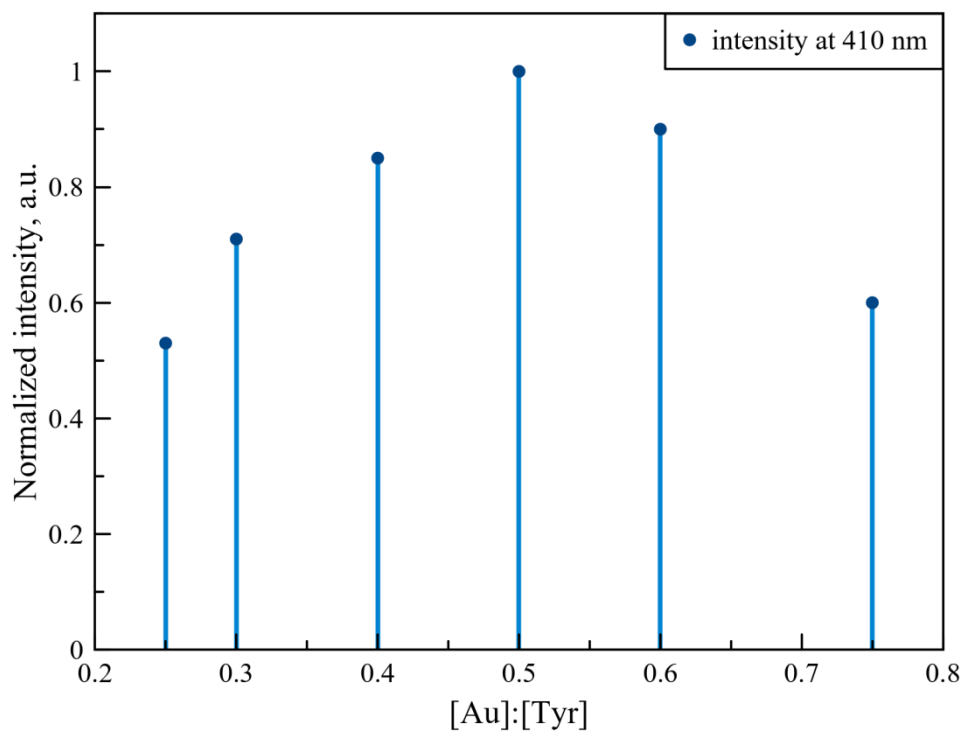

**Figure S10.** Relative emission intensity at 410 nm of Tyr-Au NCs (b) versus [Au]:[Tyr] ratio. The solvent pH is 7.

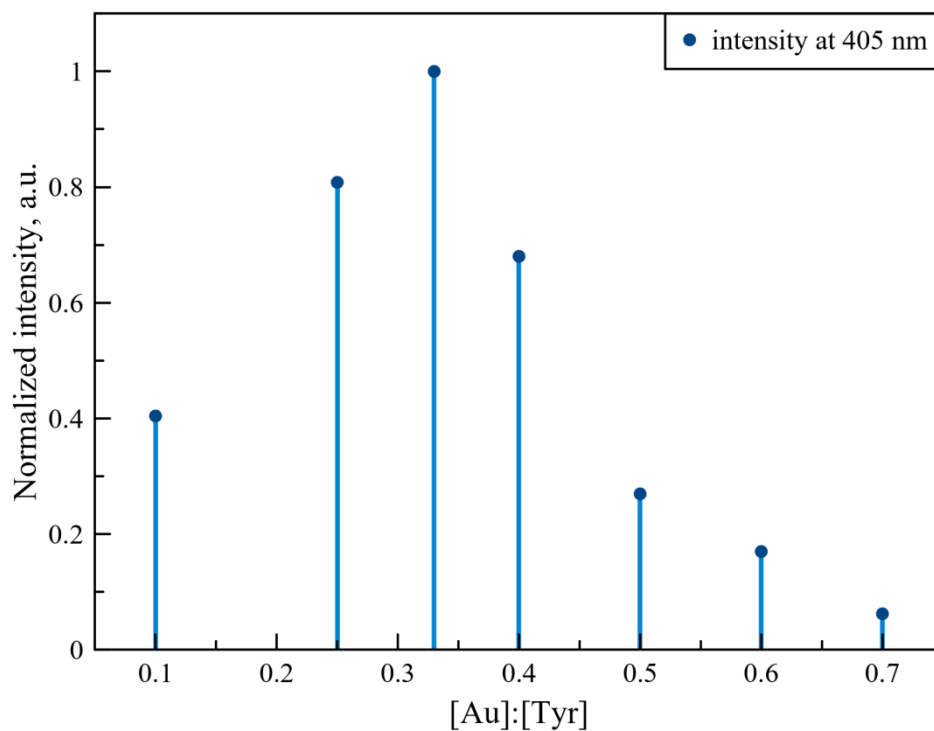

**Figure S11.** Relative emission intensity at 405 nm of Tyr-Au NCs (a) versus [Au]:[Tyr] ratio. The solvent pH is 10.5.

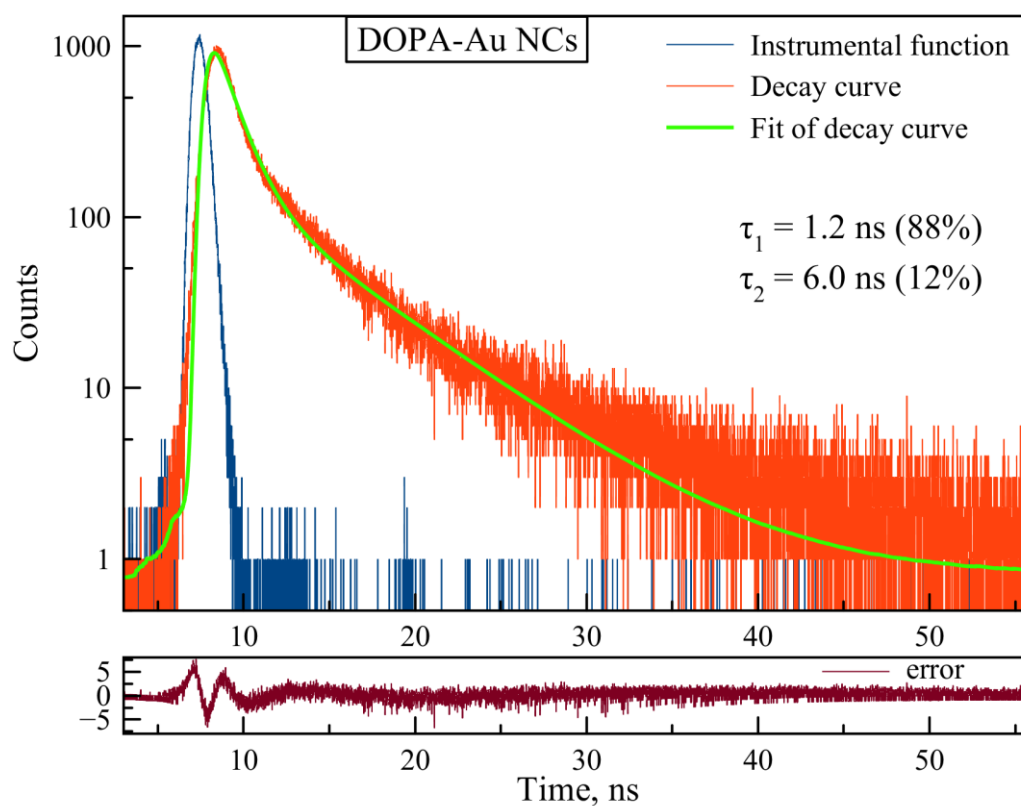

**Figure S12.** Fluorescence decay of DOPA-Au NCs ( $\lambda_{ex}$  340 nm,  $\lambda_{em}$  415 nm).  
 Fit:  $0.88\exp(-t/1.2) + 0.12\exp(-t/6.0)$ .

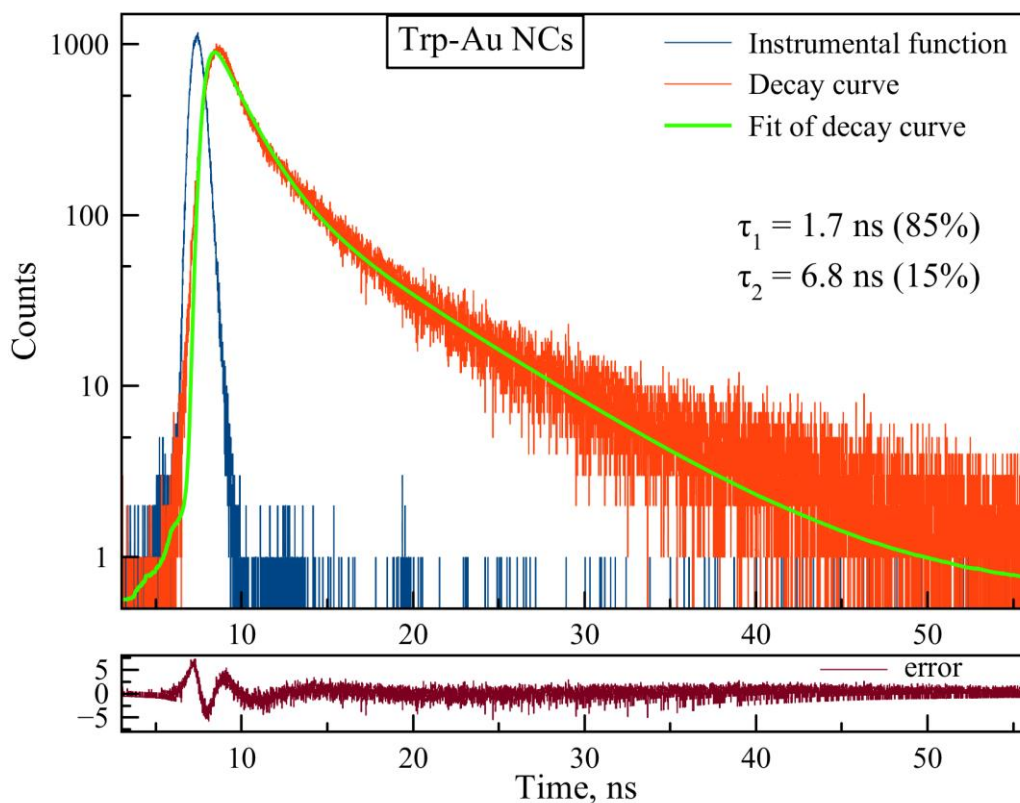

**Figure S13.** Fluorescence decay of Trp-Au NCs ( $\lambda_{ex}$  340 nm,  $\lambda_{em}$  460 nm).  
 Fit:  $0.85\exp(-t/1.7) + 0.15\exp(-t/6.8)$ .

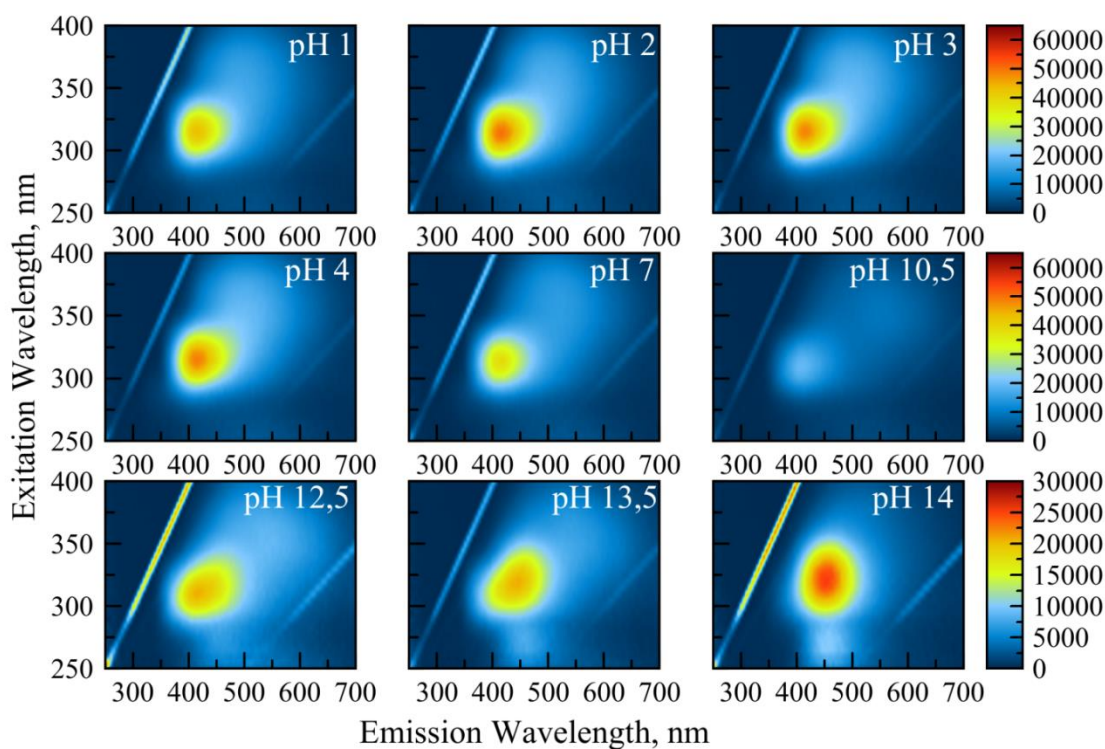

**Figure S14.** 2D contour plots for DOPA-Au NCs in various pH conditions.



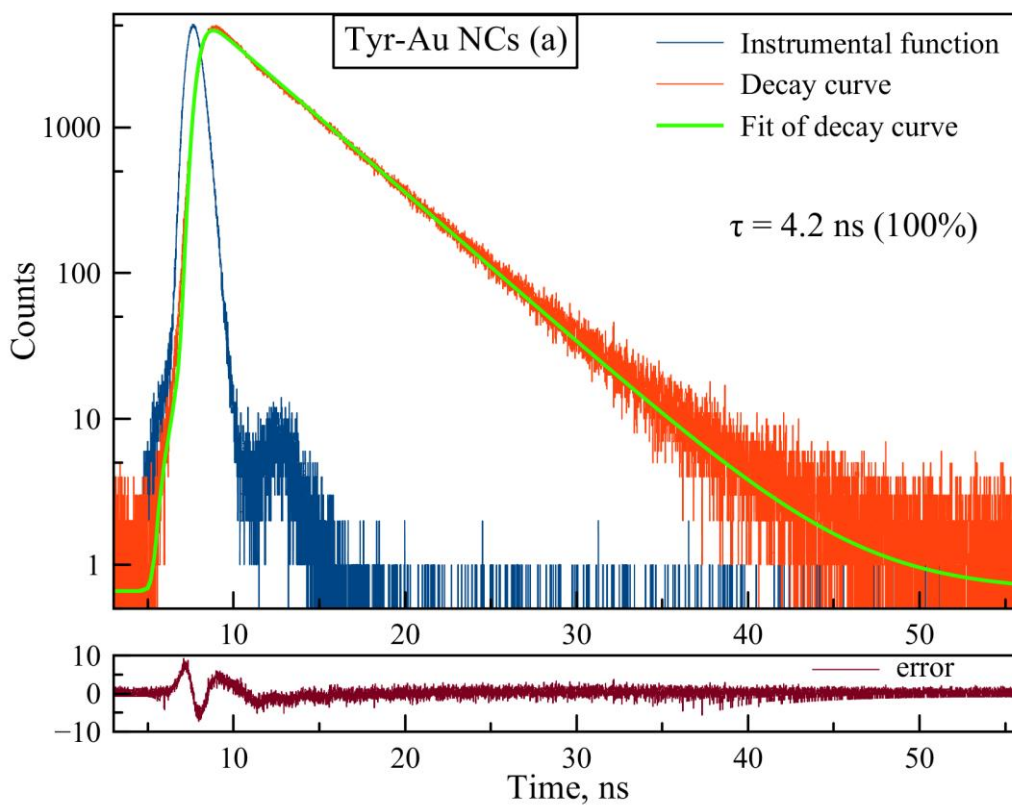

**Figure S15.** Fluorescence decay of Tyr-Au NCs (a) ( $\lambda_{ex}$  340 nm,  $\lambda_{em}$  405 nm).

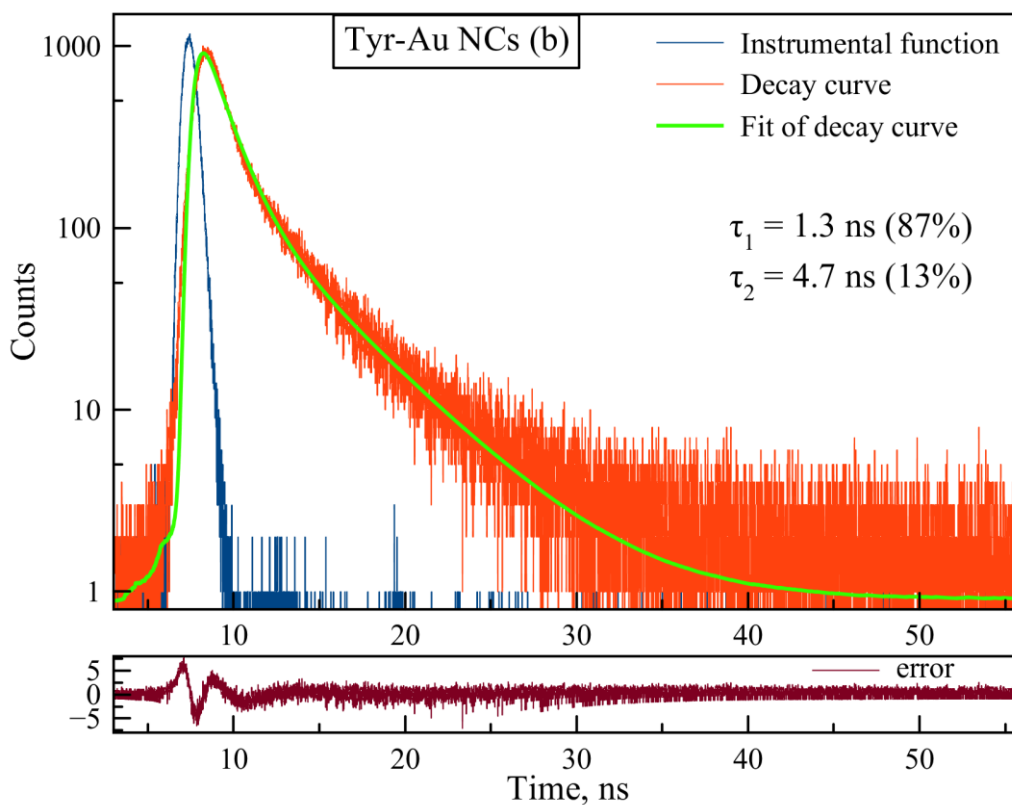

**Figure S16.** Fluorescence decay of Tyr-Au NCs (b) ( $\lambda_{ex}$  266 nm,  $\lambda_{em}$  410 nm).  
 Fit:  $0.87\exp(-t/1.3) + 0.13\exp(-t/4.7)$ .

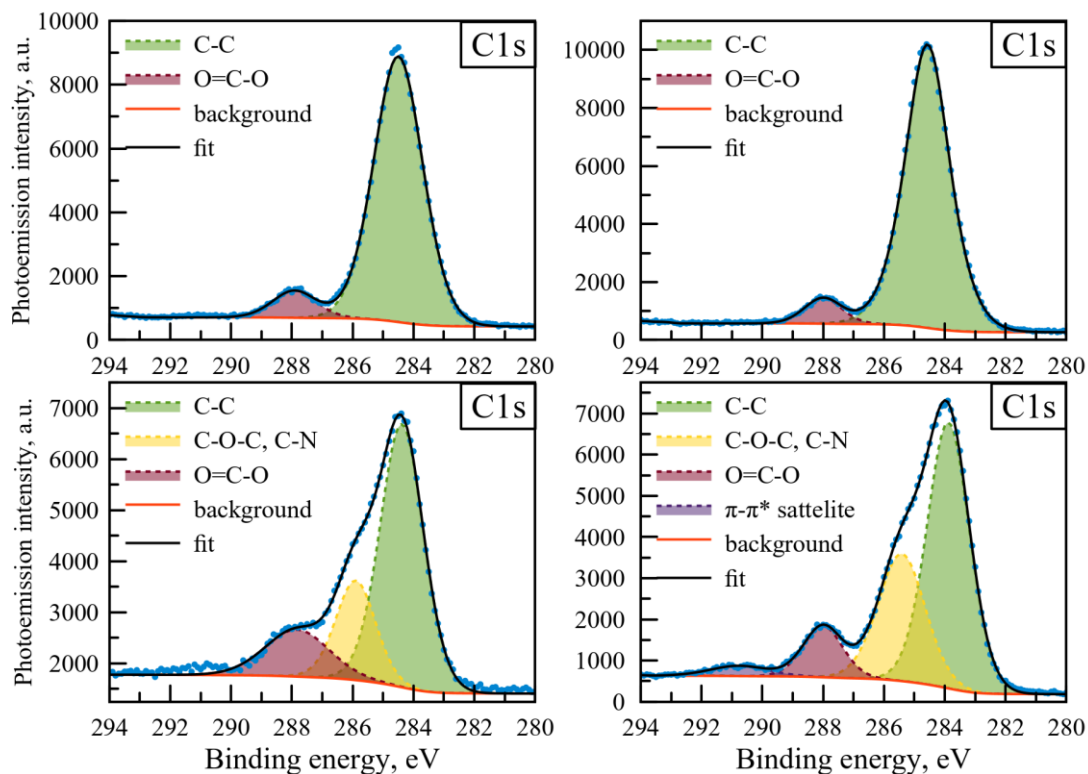

**Figure S17.** Left: *C(1s)* XPS spectra of Tyr (top) and Tyr-Au NCs (b) (bottom). Right: *C(1s)* XPS spectra of Tyr (top) and Tyr-Au NCs (a) (bottom).

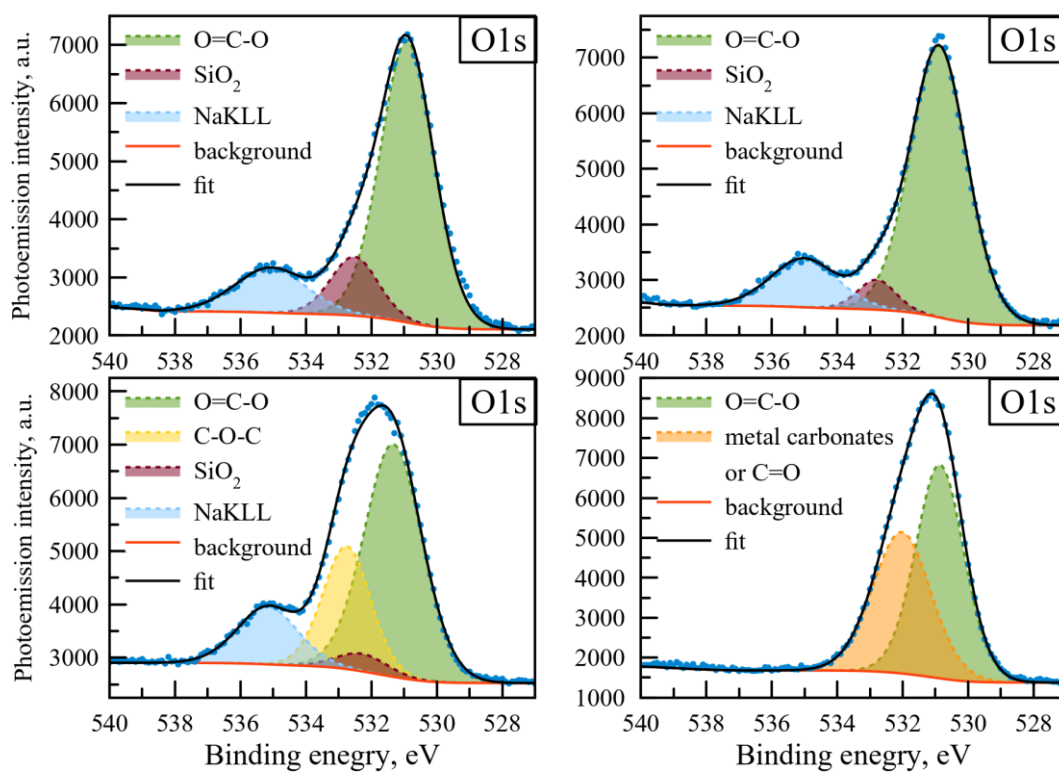

**Figure S18.** Left: *O(1s)* XPS spectra of Tyr (top) and Tyr-Au NCs (b) (bottom). Right: *O(1s)* XPS spectra of Tyr (top) and Tyr-Au NCs (a) (bottom).

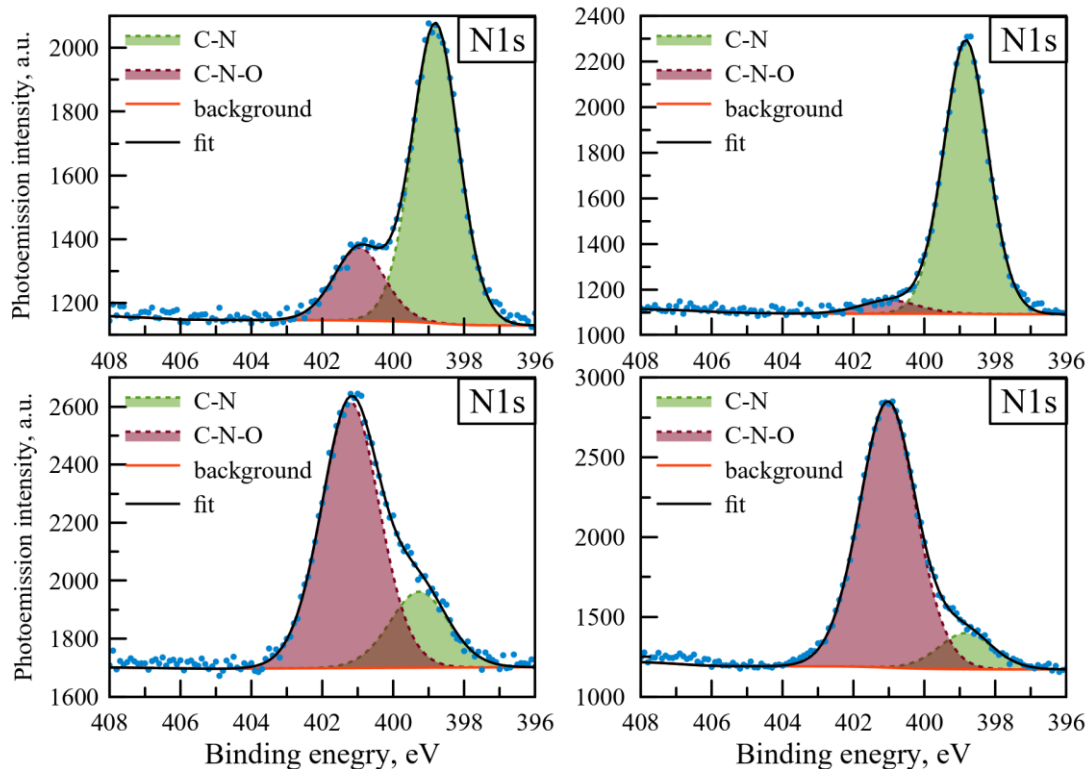

**Figure S19.** Left:  $N(1s)$  XPS spectra of Tyr (top) and Tyr-Au NCs (b) (bottom). Right:  $N(1s)$  XPS spectra of Tyr (top) and Tyr-Au NCs (a) (bottom).

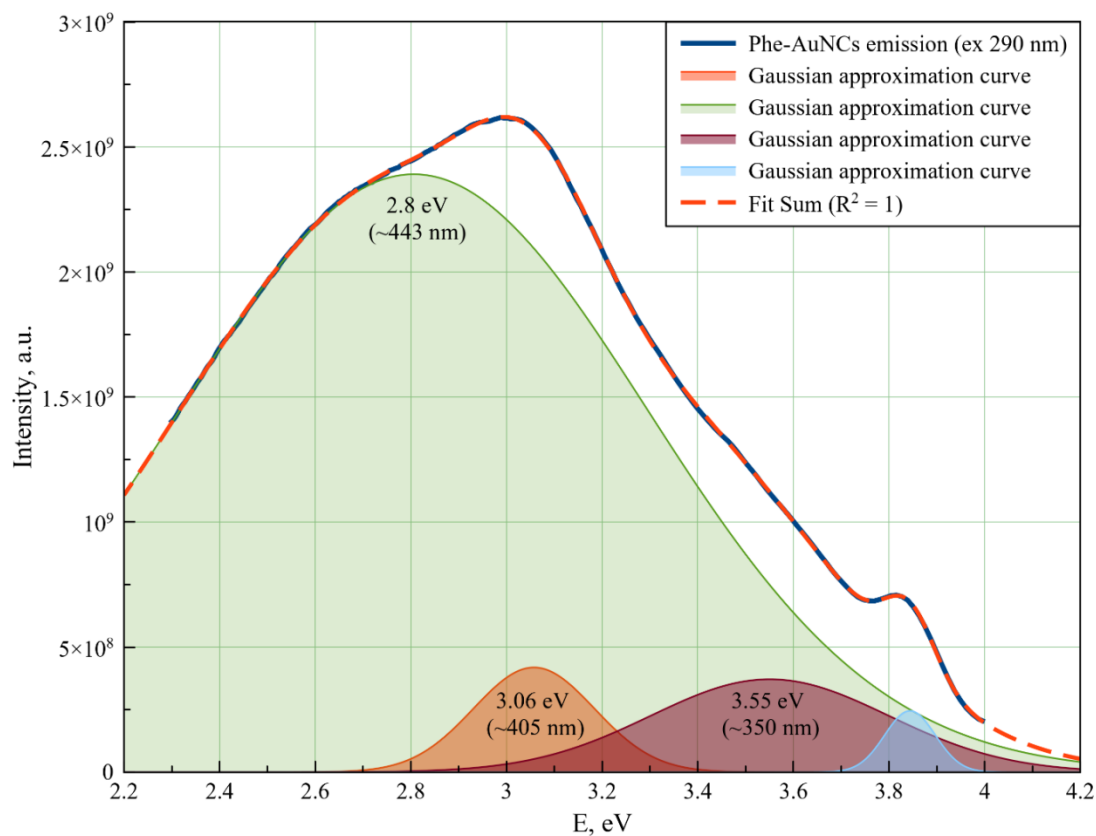

**Figure S20.** Decomposition of the emission spectrum of Phe-Au NCs into three Gauss peaks.

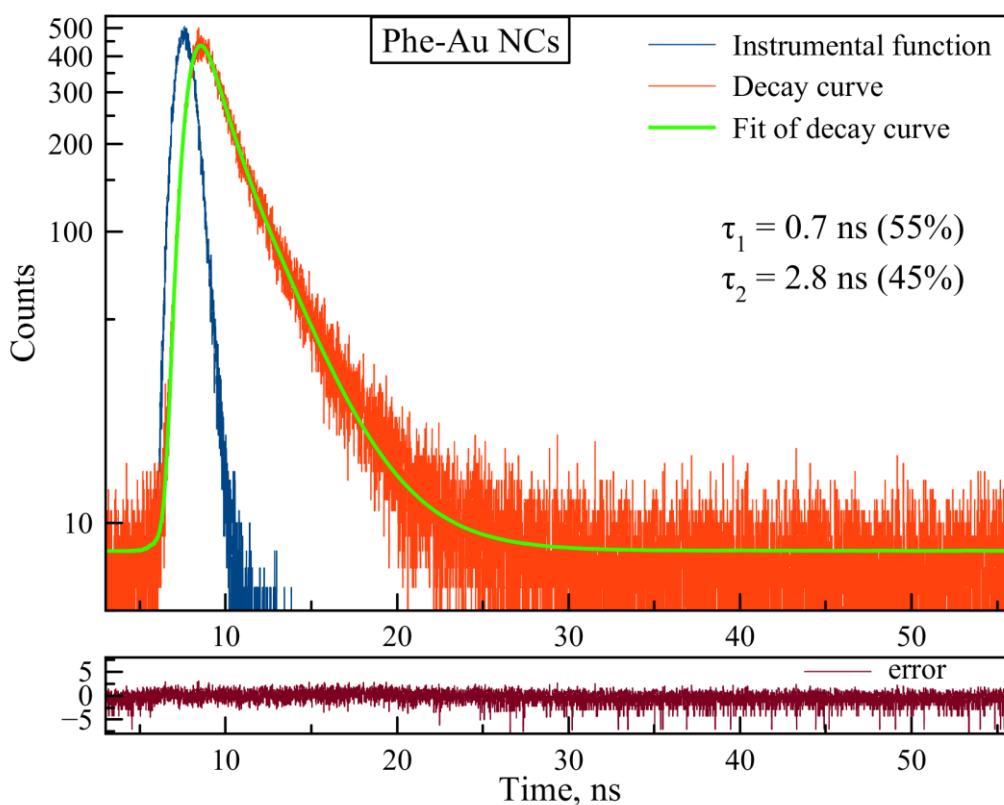

**Figure S21.** Fluorescence decay of Phe-Au NCs ( $\lambda_{ex}$  266 nm,  $\lambda_{em}$  350 nm).  
 Fit:  $0.55\exp(-t/0.7) + 0.45\exp(-t/2.8)$ .

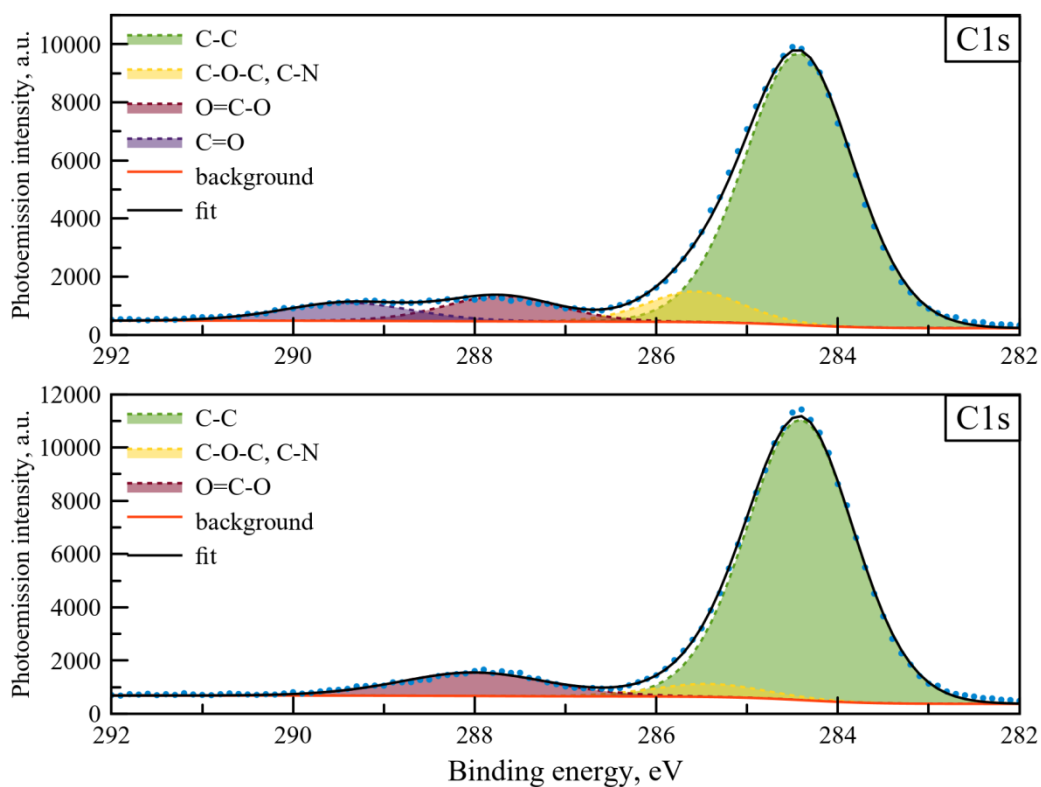

**Figure S22.** C(1s) XPS spectra of Phe (top) and Phe-Au NCs (bottom).

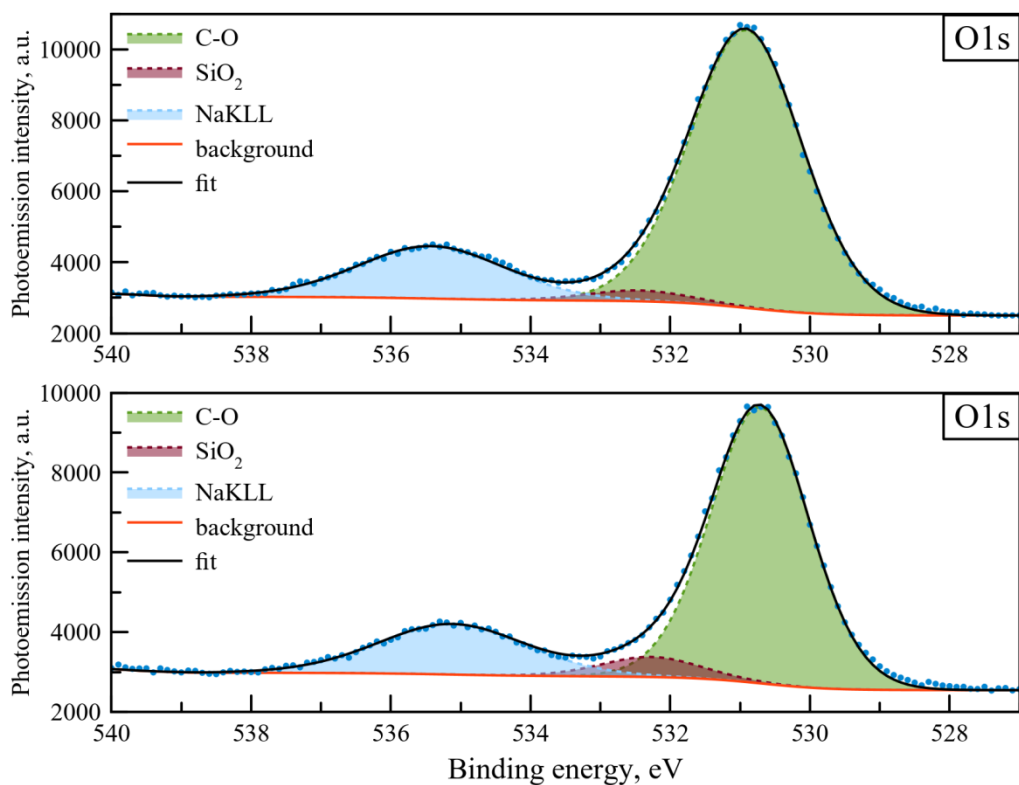

**Figure S23.** *O(1s)* XPS spectra of Phe (top) and Phe-Au NCs (bottom).

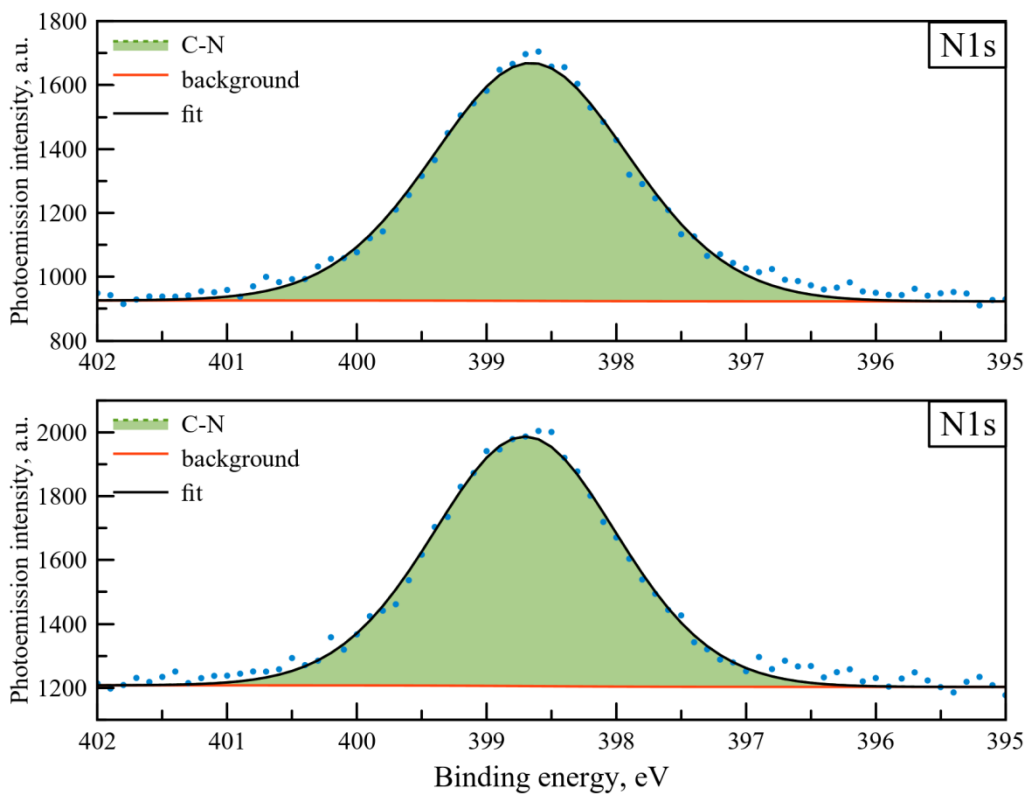

**Figure S24.** *N(1s)* XPS spectra of Phe (top) and Phe-Au NCs (bottom).

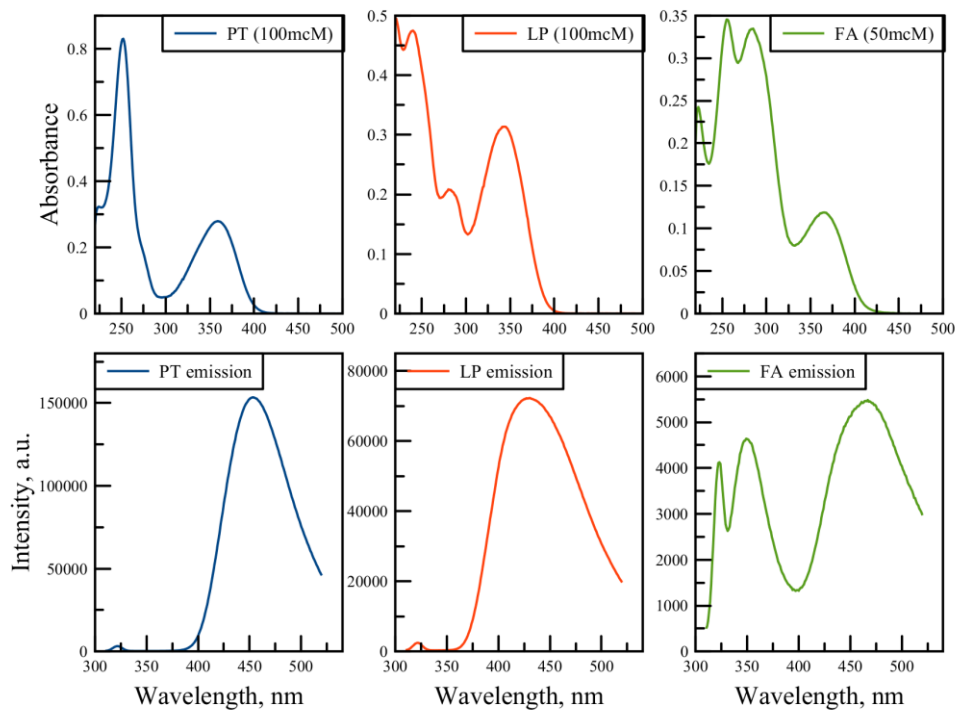

**Figure S25.** Absorption (top) and emission (bottom) spectra of Ptr (left), Lep (in center) and FA (right).

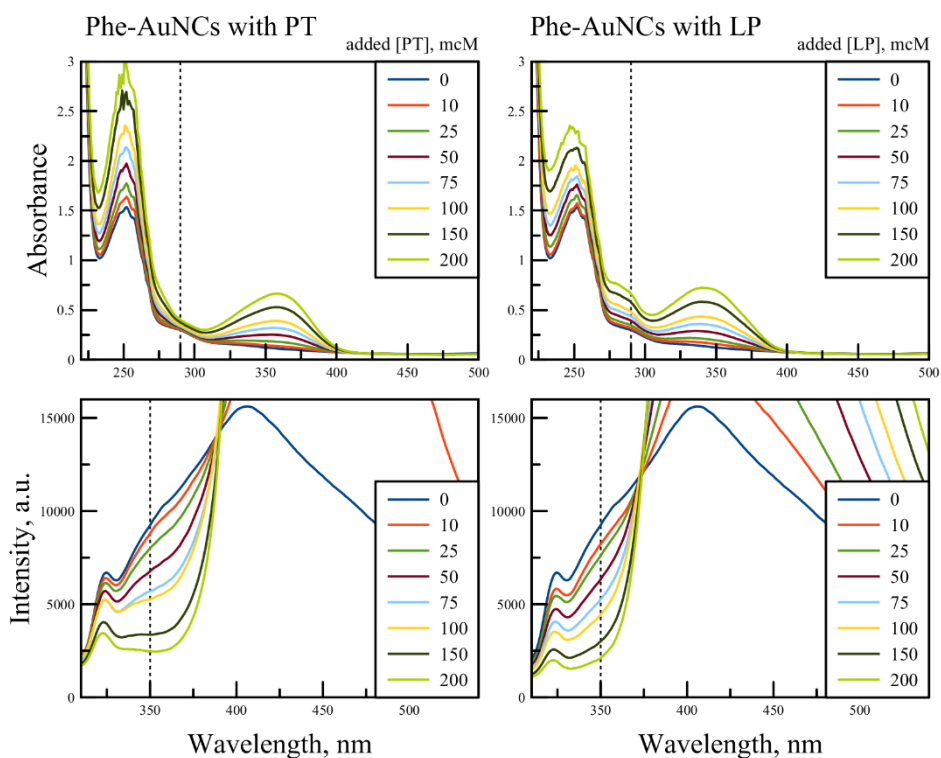

**Figure S26.** Absorption (top) and emission (bottom) spectra of Phe-Au NCs in the presence of Ptr (left) and Lep (right).

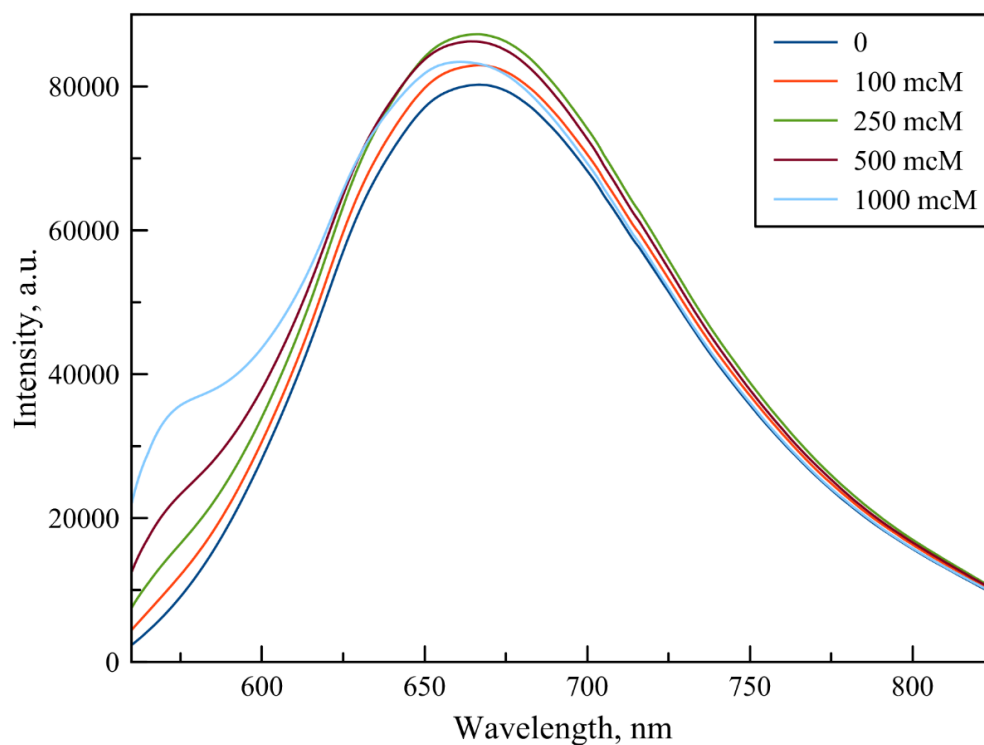

**Figure S27.** Emission spectra of BSA-Au NCs in the presence of different Ptr concentrations. BSA-Au NCs synthesis protocol: [BSA] = 1 mg/ml; initial pH 12.5; [Au]:[BSA] = 140:1.

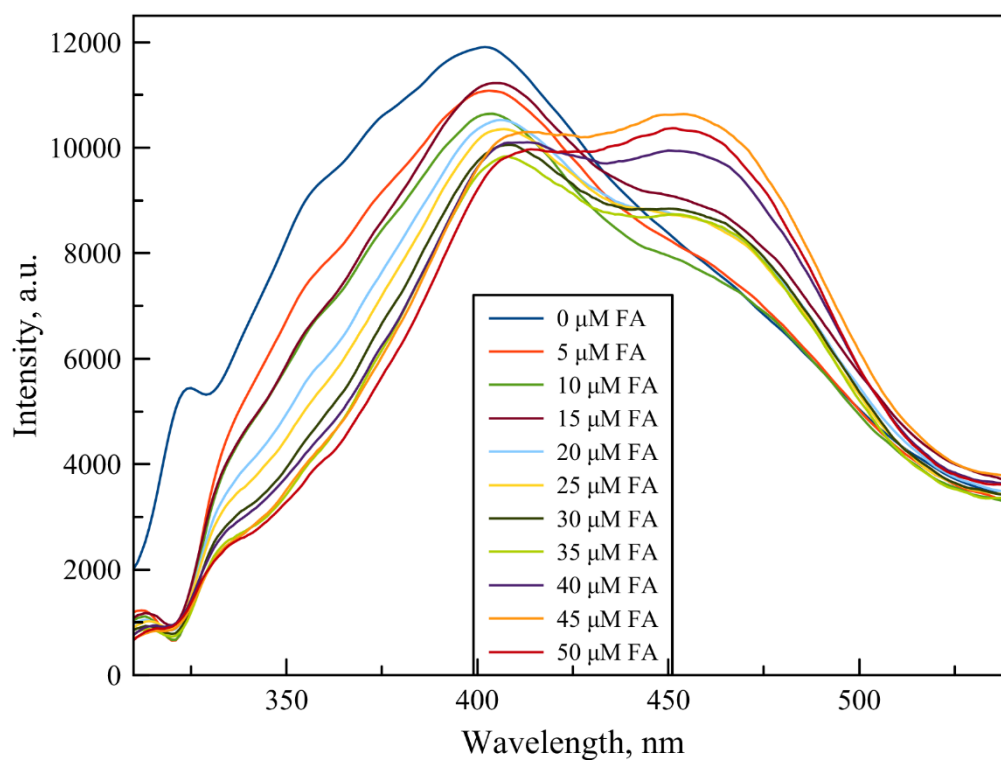

**Figure S28.** Emission spectra of Phe-Au NCs (excitation at 290 nm) in the presence of FA.

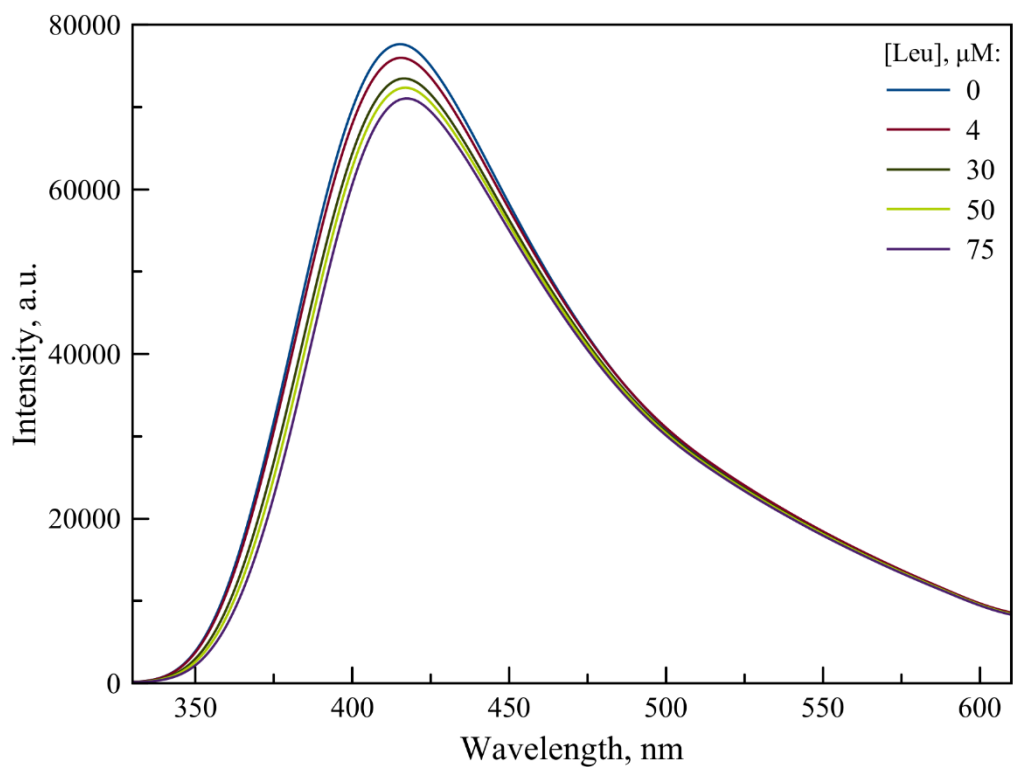

**Figure S29.** Emission spectra of DOPA-Au NCs (excitation at 315 nm) in the presence of Lep.

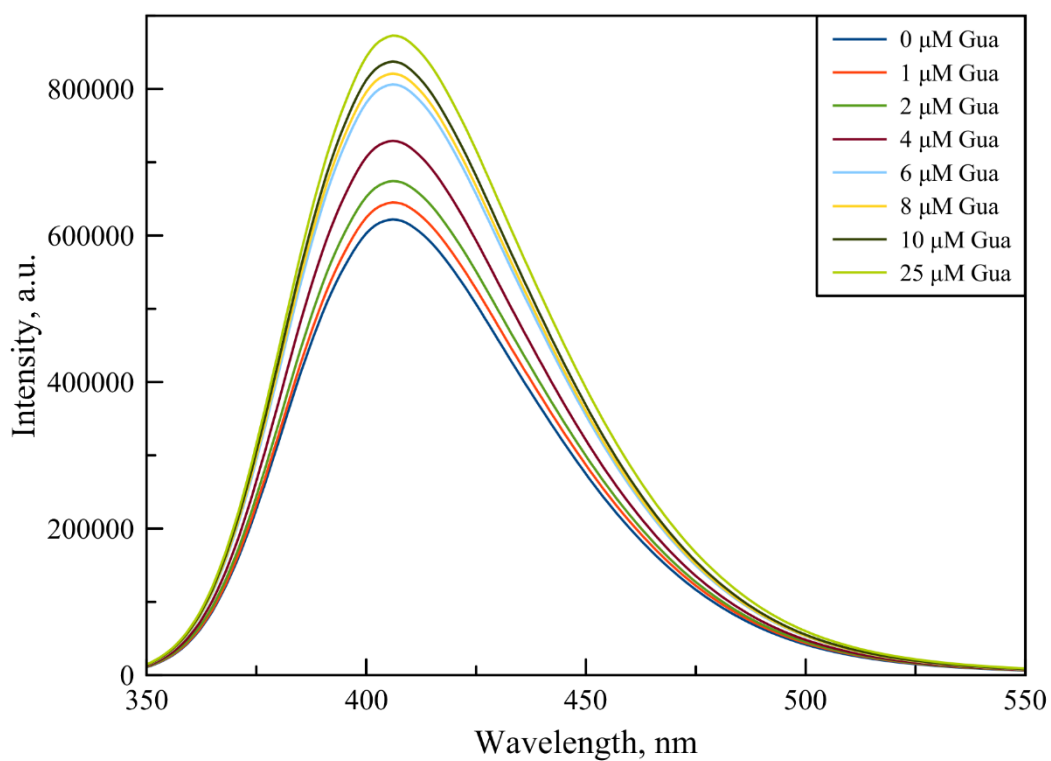

**Figure S30.** Emission spectra of Tyr-Au NCs (a) (excitation at 315 nm) in the presence of guanine.



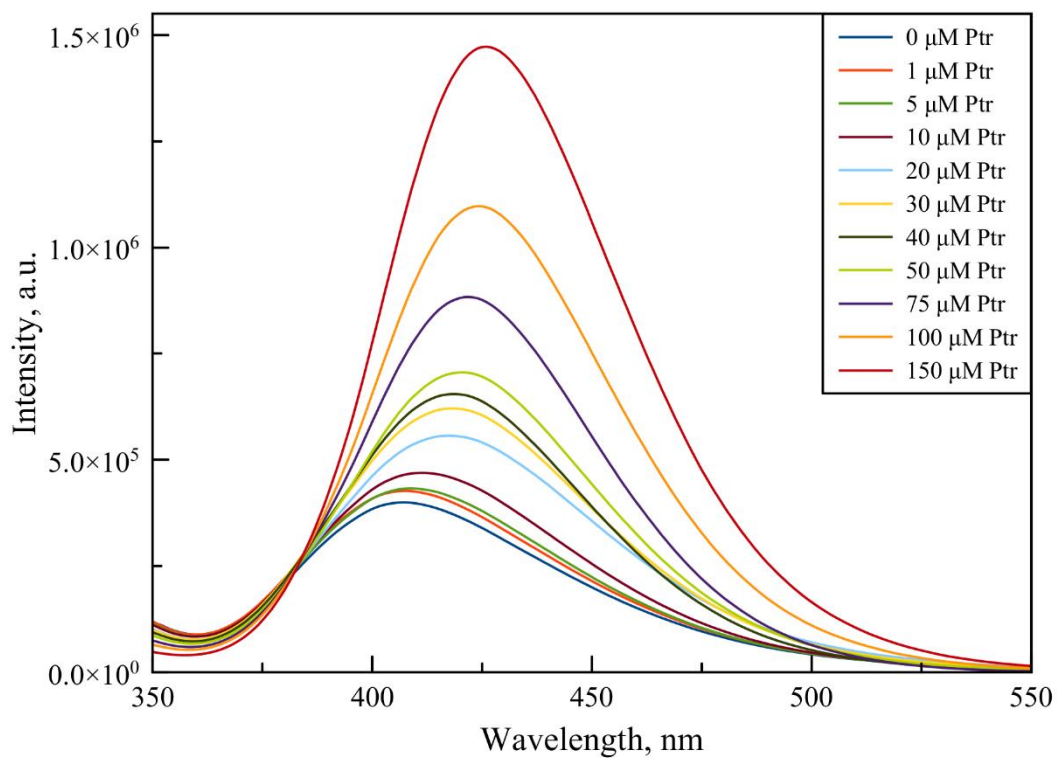

**Figure S31.** Emission spectra of Tyr-Au NCs (b) (excitation at 285 nm) in the presence of Ptr.

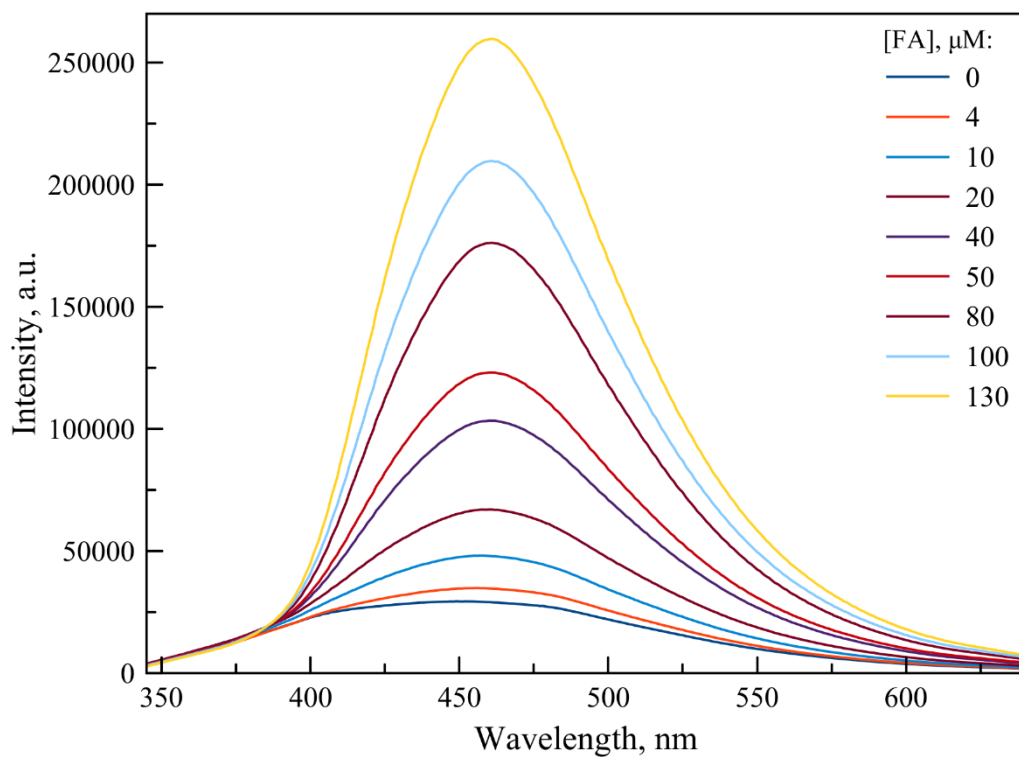

**Figure S32.** Emission spectra of Trp-Au NCs (excitation at 330 nm) in the presence of FA.

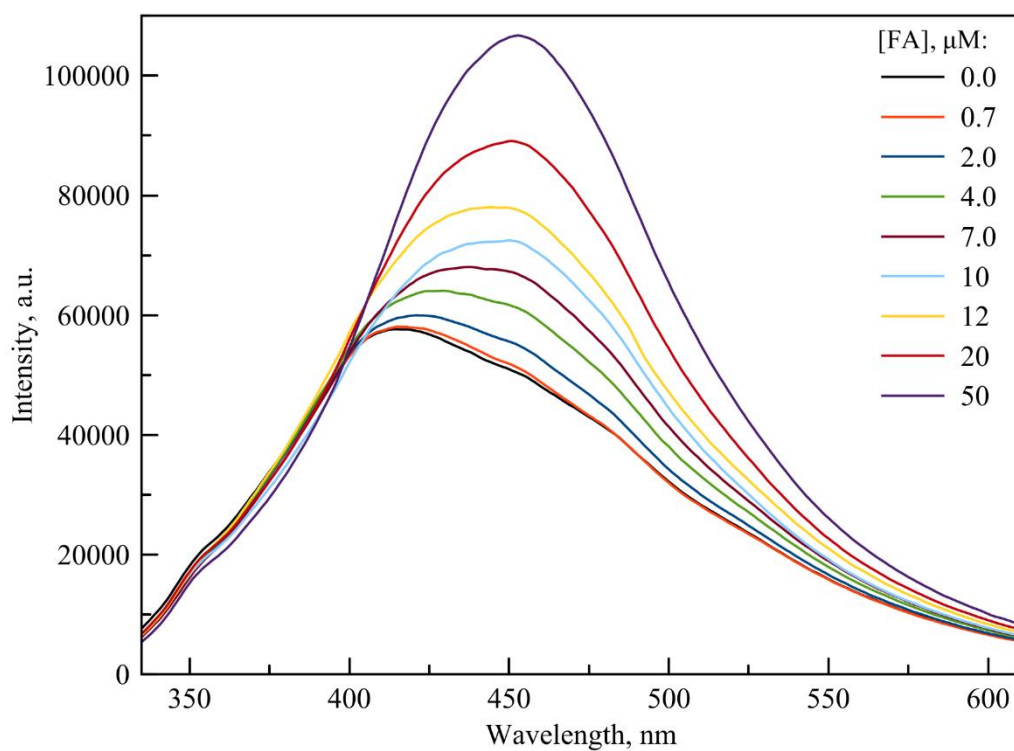

**Figure S33.** Emission spectra of Trp-Au NCs (excitation at 330 nm) in serum in the presence of FA.

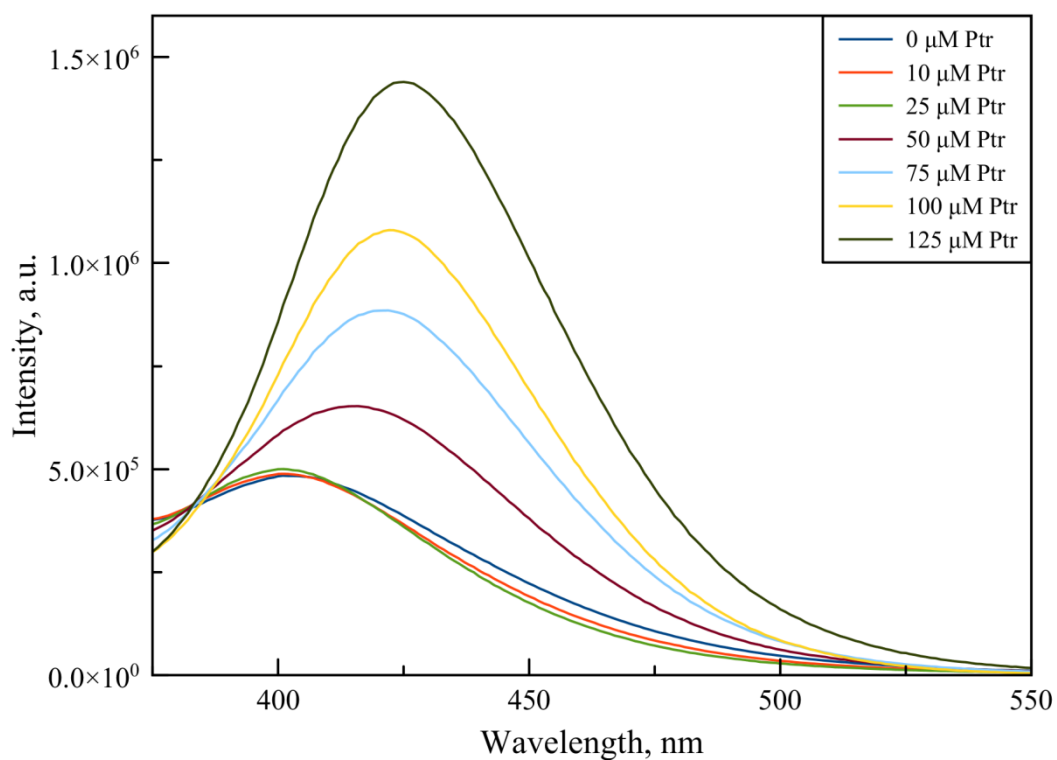

**Figure S34.** Emission spectra of Tyr-Au NCs (b) (excitation at 285 nm) in serum in the presence of Ptr.

**Table S1.** Table of dependence of normalized emission intensity at 410 nm of DOPA-Au NCs on the synthesis parameters: [Au]:[DOPA] ratio and solvent pH.

| DOPA-AuNCs<br>Intensity<br>at 410 nm |      | [Au]:[DOPA] |      |      |      |      |      |      |      |      |
|--------------------------------------|------|-------------|------|------|------|------|------|------|------|------|
|                                      |      | 10.0        | 6.7  | 5.0  | 4.0  | 3.3  | 2.5  | 2.0  | 1.0  | 0.5  |
| Solvent pH                           | 13.1 | --          | --   | 0.19 | --   | --   | --   | --   | --   | --   |
|                                      | 12.0 | --          | --   | 0.24 | 0.21 | 0.10 | --   | --   | --   | --   |
|                                      | 11.5 | --          | 0.19 | 0.58 | 0.67 | 0.27 | --   | --   | --   | --   |
|                                      | 11.0 | 0.08        | 0.26 | 1.00 | 0.70 | 0.26 | 0.12 | 0.11 | --   | --   |
|                                      | 10.5 | --          | 0.33 | 0.66 | 0.37 | 0.23 | --   | --   | --   | --   |
|                                      | 10.0 | --          | 0.26 | 0.37 | 0.25 | --   | --   | --   | --   | --   |
|                                      | 9.6  | --          | 0.26 | 0.38 | 0.25 | --   | --   | --   | --   | --   |
|                                      | 8.9  | --          | 0.26 | 0.39 | 0.25 | --   | --   | --   | --   | --   |
|                                      | 8.5  | 0.16        | 0.27 | 0.35 | 0.34 | 0.20 | --   | --   | --   | --   |
|                                      | 7.0  | 0.17        | --   | 0.38 | --   | 0.21 | 0.14 | --   | --   | --   |
|                                      | 5.0  | 0.16        | --   | 0.37 | --   | 0.19 | 0.14 | 0.14 | 0.06 | 0.04 |
|                                      | 4.0  | 0.13        | --   | 0.38 | --   | 0.19 | 0.15 | 0.13 | 0.06 | 0.04 |
|                                      | 3.0  | 0.08        | --   | 0.39 | --   | 0.22 | 0.15 | --   | --   | --   |
|                                      | 2.0  | 0.07        | --   | 0.58 | --   | 0.25 | 0.13 | 0.06 | 0.05 | 0.03 |
| 1.0                                  | 0.03 | --          | 0.15 | --   | 0.05 | 0.05 | 0.06 | 0.05 | 0.04 |      |

**Table S2.** Table of dependence of normalized emission intensity at 460 nm of Trp-Au NCs on the synthesis parameters: [Au]:[Trp] ratio and solvent pH.

| Trp-Au NCs<br>Intensity<br>at 460 nm |     | [Au]:[Trp] |      |      |      |      |      |      |      |      |      |
|--------------------------------------|-----|------------|------|------|------|------|------|------|------|------|------|
|                                      |     | 15         | 5    | 3.3  | 2.9  | 2.5  | 2.2  | 2.0  | 1.0  | 0.50 | 0.33 |
| Solvent pH                           | 7.0 | --         | --   | --   | --   | --   | --   | 0.40 | 0.22 | 0.12 | 0.07 |
|                                      | 5.0 | --         | --   | --   | --   | --   | --   | 0.40 | 0.21 | 0.11 | 0.06 |
|                                      | 4.0 | --         | --   | --   | --   | --   | --   | 0.41 | 0.23 | 0.13 | 0.07 |
|                                      | 2.0 | 0.12       | 0.34 | 0.32 | 0.40 | 0.45 | 0.46 | 0.51 | 0.42 | 0.38 | 0.25 |
|                                      | 1.0 | 0.05       | 0.32 | 0.49 | 0.87 | 0.99 | 1.00 | 0.94 | 0.53 | 0.25 | 0.16 |

**Table S3.** Normalized emission intensity at 350 nm of Phe-Au NCs in dependence of [Phe]:[Au] ratio and dilution rate of obtained complexes after synthesis.

| Phe-AuNCs<br>Intensity at 350 nm |    | [Phe]:[Au] ratio |       |       |       |
|----------------------------------|----|------------------|-------|-------|-------|
|                                  |    | 0                | 2     | 5     | 10    |
| dilution<br>rate                 | -  | 0,061            | -     | -     | 0,404 |
|                                  | 5  | -                | -     | 1,000 | 0,948 |
|                                  | 50 | -                | 0,281 | 0,274 | 0,165 |

**Table S4.** Synthesis conditions and photophysical properties of different AA-Au NCs.

| AA   | [Au]/[AA] | Solvent pH* | Sensor for                          | $\lambda_{ex}/\lambda_{em}$ , nm | QY, % | Reference                                                                                               |
|------|-----------|-------------|-------------------------------------|----------------------------------|-------|---------------------------------------------------------------------------------------------------------|
| Tyr  | 1.30      | 5.0         | Al <sup>3+</sup> , Fe ions          | 383/498                          | 1.7   | <a href="https://doi.org/10.1039/C4AY01137F">https://doi.org/10.1039/C4AY01137F</a>                     |
|      | 0.55      | 2.0         | tyrosinase                          | 385/470                          | 2.5   | <a href="https://doi.org/10.1016/j.aca.2014.05.050">https://doi.org/10.1016/j.aca.2014.05.050</a>       |
|      | 0.50      | 7.0         | guanine                             | 285/405                          | 7     | This work                                                                                               |
|      | 0.33      | 10.5        | pterin                              | 315/405                          | 26    | This work                                                                                               |
| DOPA | 5.0       | 4.0-10.3    | ascorbic acid (through Fe ions)     | 360/545                          | --    | <a href="https://doi.org/10.1016/j.snb.2017.02.151">https://doi.org/10.1016/j.snb.2017.02.151</a>       |
|      | 2.6       | 4.5         | Fe ions                             | 360/525                          | 1.7   | <a href="https://doi.org/10.1021/ac203362g">https://doi.org/10.1021/ac203362g</a>                       |
|      | 1.8       | 4.0         | hROS                                | 360/464                          | --    | <a href="https://doi.org/10.1021/acs.analchem.0c01147">https://doi.org/10.1021/acs.analchem.0c01147</a> |
|      | 5.0       | 11.0        | leucopterin                         | 315/415                          | 1.0   | This work                                                                                               |
| Trp  | 0.37      | 5.0         | Fe ions                             | 305/450                          | 2.9   | <a href="https://doi.org/10.1016/j.snb.2016.11.052">https://doi.org/10.1016/j.snb.2016.11.052</a>       |
|      | 2.20      | 1.0         | Folic acid                          | 330/460                          | 0.7   | This work                                                                                               |
| Phe  | 0.50      | 6.0         | I <sup>-</sup>                      | 320/390                          | --    | <a href="https://doi.org/10.1038/s41598-022-05155-5">https://doi.org/10.1038/s41598-022-05155-5</a>     |
|      | 0.10      | 13.0        | pterin<br>leucopterin<br>folic acid | 290/350                          | 4.3   | This work                                                                                               |

**Table S5.** LOD values for analytes under different detection methods.

| Analyte     | Method/Fluorescent sensor                    | LOD, $\mu$ M | Reference                                                                                                 | Year |
|-------------|----------------------------------------------|--------------|-----------------------------------------------------------------------------------------------------------|------|
| Guanine     | electrochemistry                             | 0.06         | <a href="https://doi.org/10.1007/s00604-021-04926-7">https://doi.org/10.1007/s00604-021-04926-7</a>       | 2021 |
|             | carbon dots                                  | 0.0064       | <a href="https://doi.org/10.1016/j.aca.2021.338977">https://doi.org/10.1016/j.aca.2021.338977</a>         | 2021 |
|             | NFR-Ag NCs on nanosheets                     | 1.85         | <a href="https://doi.org/10.1016/j.talanta.2018.09.097">https://doi.org/10.1016/j.talanta.2018.09.097</a> | 2018 |
|             | Tyr-Au NCs                                   | 0.7          | This work                                                                                                 |      |
| Leucopterin | liquid chromatography with mass spectrometry | 0.0072       | <a href="https://doi.org/10.1016/j.jchromb.2013.05.004">https://doi.org/10.1016/j.jchromb.2013.05.004</a> | 2013 |
|             | capillary electrophoresis                    | 0.56         | <a href="https://doi.org/10.1016/j.chroma.2014.02.019">https://doi.org/10.1016/j.chroma.2014.02.019</a>   | 2014 |
|             | DOPA-Au NCs                                  | 2.8          | This work                                                                                                 |      |
|             | Phe-Au NCs                                   | 9            | This work                                                                                                 |      |
| Pterin      | liquid chromatography with mass spectrometry | 0.0006       | <a href="https://doi.org/10.4155/bio.12.131">https://doi.org/10.4155/bio.12.131</a>                       | 2012 |
|             | liquid chromatography                        | 0.018        | <a href="https://doi.org/10.1016/j.jpba.2013.12.012">https://doi.org/10.1016/j.jpba.2013.12.012</a>       | 2013 |
|             | capillary electrophoresis                    | 0.1          | <a href="https://doi.org/10.3390/molecules24061166">https://doi.org/10.3390/molecules24061166</a>         | 2019 |
|             | Tyr-Au NCs                                   | 4.4          | This work                                                                                                 |      |
|             | Phe-Au NCs                                   | 11           | This work                                                                                                 |      |

|            |                                              |        |                                                                                                           |      |
|------------|----------------------------------------------|--------|-----------------------------------------------------------------------------------------------------------|------|
| Folic Acid | flow injection analysis                      | 0.068  | <a href="https://doi.org/10.1002/pca.704">https://doi.org/10.1002/pca.704</a>                             | 2003 |
|            | capillary electrophoresis                    | 0.02   | <a href="https://doi.org/10.1016/j.chroma.2005.11.052">https://doi.org/10.1016/j.chroma.2005.11.052</a>   | 2006 |
|            | SERS                                         | 0.009  | <a href="https://doi.org/10.1021/nn201606r">https://doi.org/10.1021/nn201606r</a>                         | 2011 |
|            | absorbance (reaction inhibition)             | 0.82   | <a href="https://doi.org/10.1016/j.saa.2011.06.015">https://doi.org/10.1016/j.saa.2011.06.015</a>         | 2011 |
|            | BSA-Au NCs                                   | 0.042  | <a href="https://doi.org/10.1016/j.snb.2014.03.075">https://doi.org/10.1016/j.snb.2014.03.075</a>         | 2014 |
|            | BSA-Au NCs with Au NPs                       | 0.065  | <a href="http://doi.org/10.1007/s00604-014-1442-z">http://doi.org/10.1007/s00604-014-1442-z</a>           | 2015 |
|            | liquid chromatography with mass spectrometry | 0.0006 | <a href="https://doi.org/10.1016/j.jpha.2015.05.004">https://doi.org/10.1016/j.jpha.2015.05.004</a>       | 2015 |
|            | electrochemistry                             | 0.01   | <a href="https://doi.org/10.1016/j.bios.2016.05.095">https://doi.org/10.1016/j.bios.2016.05.095</a>       | 2016 |
|            | carbon dots                                  | 0.04   | <a href="https://doi.org/10.1016/j.snb.2018.01.227">https://doi.org/10.1016/j.snb.2018.01.227</a>         | 2018 |
|            | carbon dots                                  | 0.38   | <a href="https://doi.org/10.1016/j.saa.2019.11.17931">https://doi.org/10.1016/j.saa.2019.11.17931</a>     | 2019 |
|            | carbon dots                                  | 0.28   | <a href="https://doi.org/10.1007/s00216-020-02507-w">https://doi.org/10.1007/s00216-020-02507-w</a>       | 2020 |
|            | ovalbumine-CuNCs                             | 0.18   | <a href="https://doi.org/10.1016/j.talanta.2018.11.067">https://doi.org/10.1016/j.talanta.2018.11.067</a> | 2018 |
|            | D-Trp-Au NCs                                 | 5.8    | <a href="https://doi.org/10.1186/s40543-021-00266-6">https://doi.org/10.1186/s40543-021-00266-6</a>       | 2021 |
|            | L-Trp-Au NCs                                 | 0.2    | This work                                                                                                 |      |
|            | Phe-Au NCs                                   | 6      | This work                                                                                                 |      |
